# Supplementary material
Source: publisher figshare collection journal article supplement (https://acs.figshare.com/ndownloader/files/4227421)
Supplement: Supplementary file 1 [file 4227421]

# **Metal-Centered Deltahedral Zintl Ions: Synthesis of $[\text{Ni}@\text{Sn}_9]^{4-}$ by Direct Extraction from Intermetallic Precursors and of the Vertex-Fused Dimer $[\{\text{Ni}@\text{Sn}_8(\mu\text{-Ge})_{1/2}\}_2]^{4-}$**

Miriam M. Gillett-Kunnath, Joseph I. Paik, Sara M. Jensen, Jacob D. Taylor, and Slavi C. Sevov\*

*Department of Chemistry and Biochemistry, University of Notre Dame, Notre Dame, Indiana 46556*

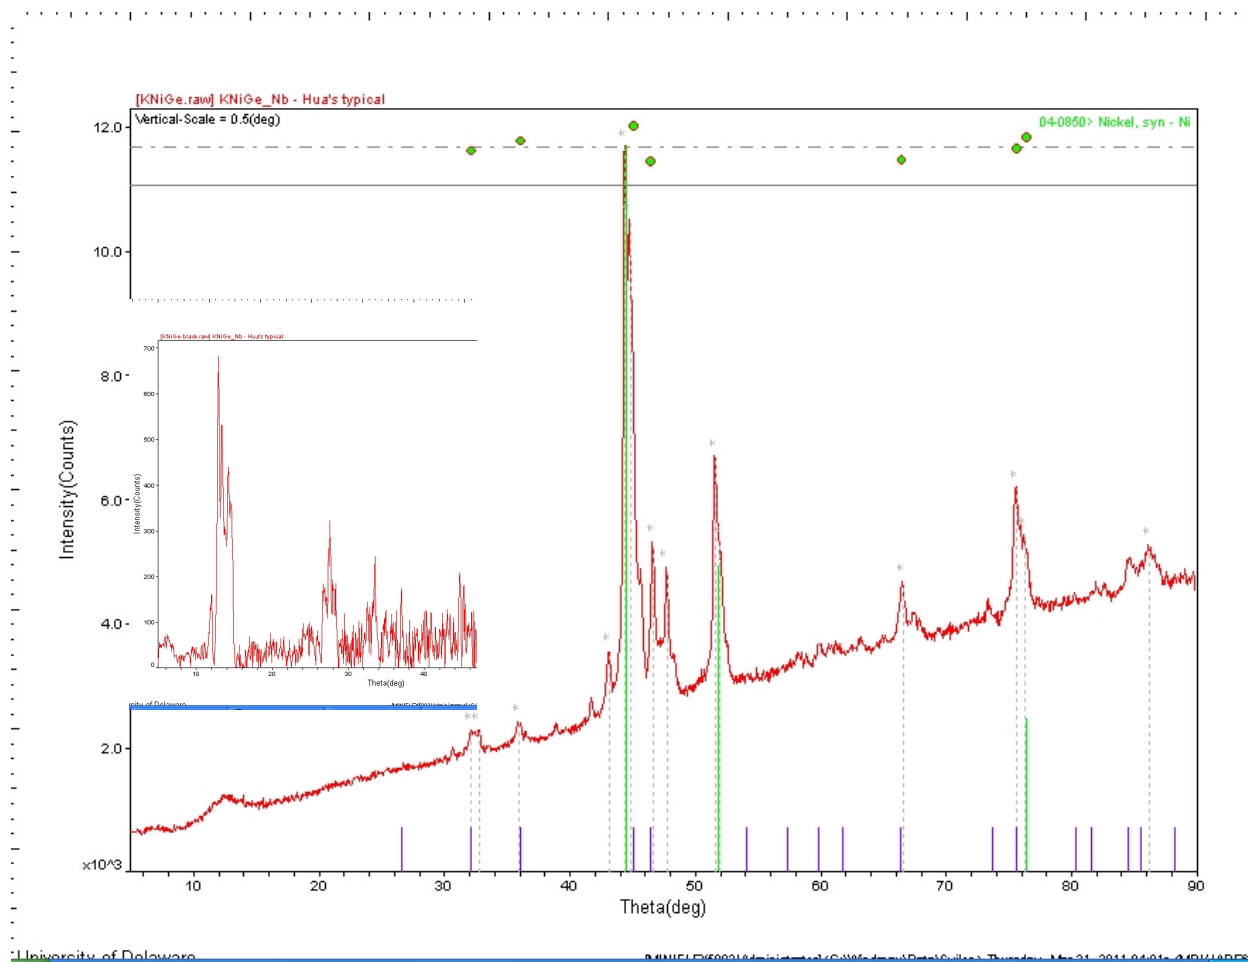

**Figure S1.** PXRD of an intermetallic precursor with a nominal composition " $\text{K}_4\text{Ge}_9\text{Ni}_3$ ": green lines - elemental Ni, blue lines -  $\text{GeNi}_2$  ( $\text{InNi}_2$  type,  $P6(3)/mmc$ ,  $a=3.95\text{\AA}$ ;  $c=5.04\text{\AA}$ ), smudge at  $\sim 13^\circ$  corresponds to  $\text{K}_4\text{Ge}_9$ . Insert: closer view of the region around  $13^\circ$ .

## Supporting Information

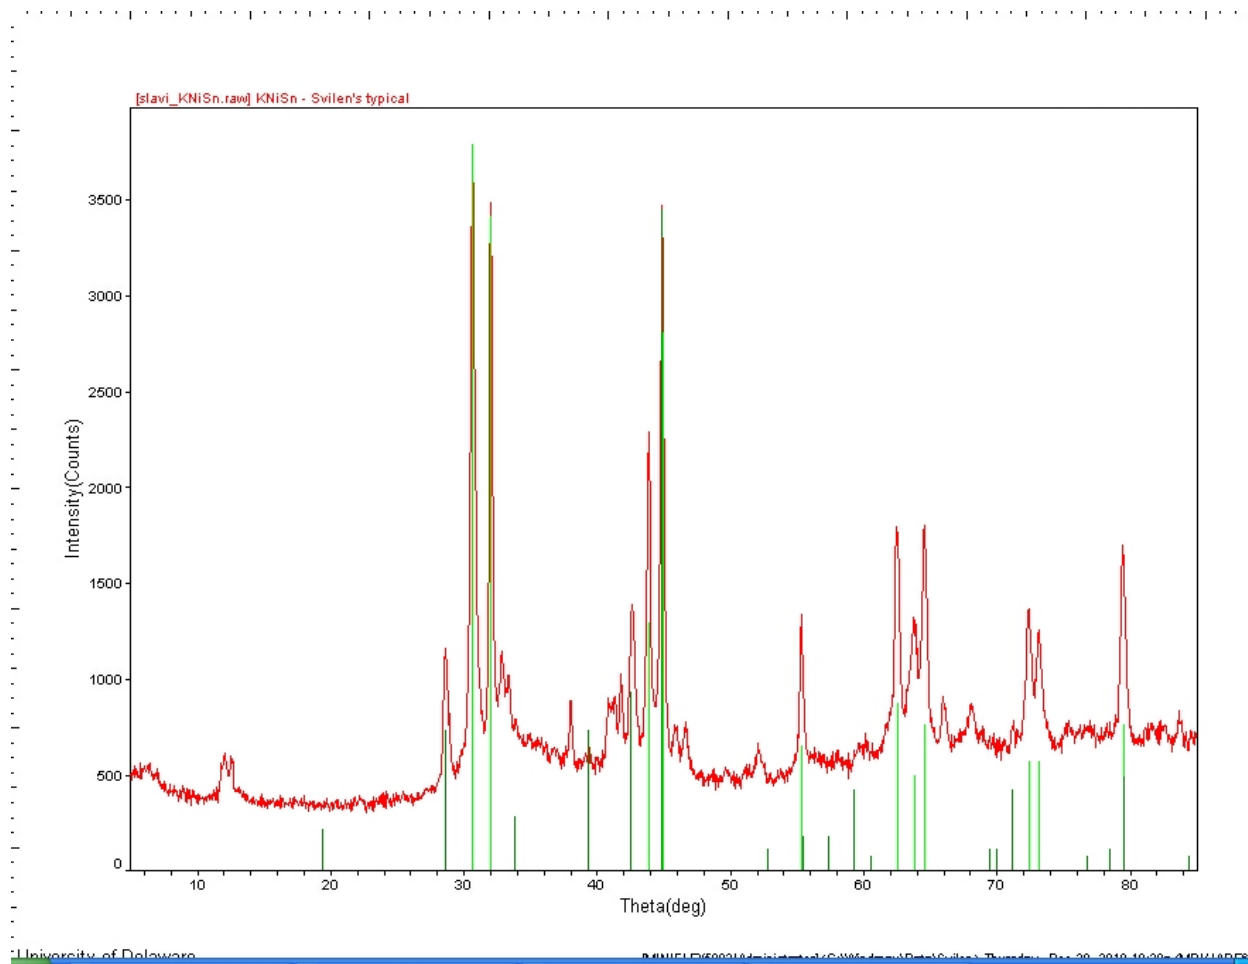

**Figure S2.** PXRD of an intermetallic precursor with a nominal composition " $\text{K}_4\text{Sn}_9\text{Ni}_3$ " with unidentified phase or phases, but no elemental Ni or any Sn-Ni binary phases are present.
